# Supplementary material for: Recrystallization techniques for the synthesis of ZnO nanorods: an in situ process for carbon doping and enhancing the dispersion concentration of ZnO nanorods
Source: Royal Society of Chemistry journal article supplement (doi:10.1039/c8ra03016b), 2018-01-01
Supplement: c8ra03016b1.pdf [file c8ra03016b1.pdf]

## Electronic Supplementary Information (ESI)

### **Recrystallization techniques for the synthesis of ZnO nanorods: An *in situ* process for carbon doping and enhancing the dispersion concentration of ZnO nanorods**

Muhammad Mohsin Hossain,<sup>a</sup> Md. Akherul Islam,<sup>b</sup> Hossain Shima,<sup>c</sup> Mudassir Hasan,<sup>d</sup> and Muhammad Hilal,<sup>e</sup> Moonyong Lee<sup>f,\*</sup>

<sup>a</sup>*Department of Energy and Materials Engineering, Dongguk University, Seoul 04620, Republic of Korea 712-749*

<sup>b</sup>*Department of Pharmacy, Atish Dipankar University of Science & Technology, Banani, Dhaka 1213, Bangladesh*

<sup>c</sup>*Department of Chemistry, Rajshahi University, Rajshahi 6205, Bangladesh*

<sup>d</sup>*Department of Chemical Engineering, King Khalid University, Abha 61411, Kingdom of Saudi Arabia*

<sup>e</sup>*Ghulam Ishaq Khan Institute of Engineering Sciences and Technology, Topi, Khyber Pakhtunkhwa, Pakistan*

<sup>f</sup>*School of Chemical Engineering, Yeungnam University, Gyeongsan 712-749, Republic of Korea*

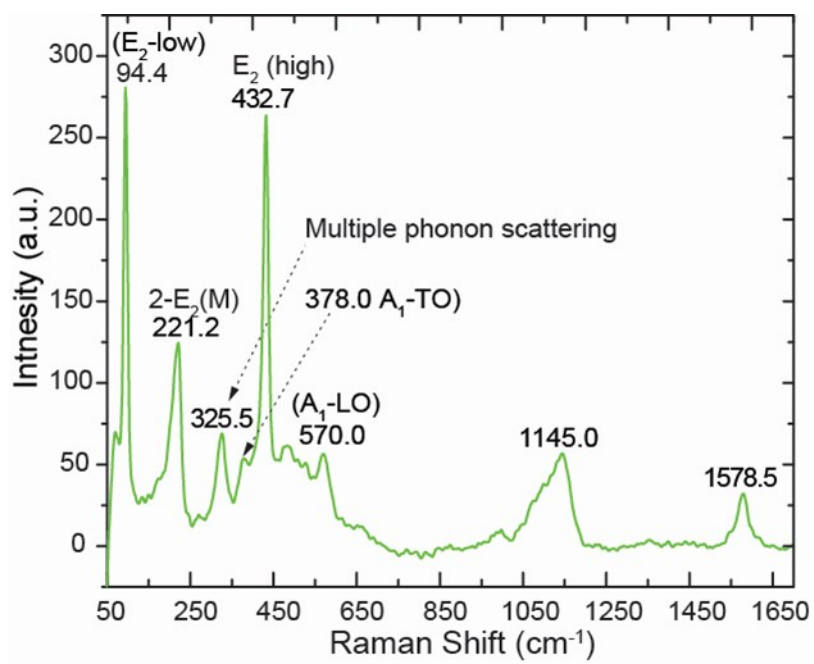

**Figure S1.** Raman spectra of ZnO nanorods

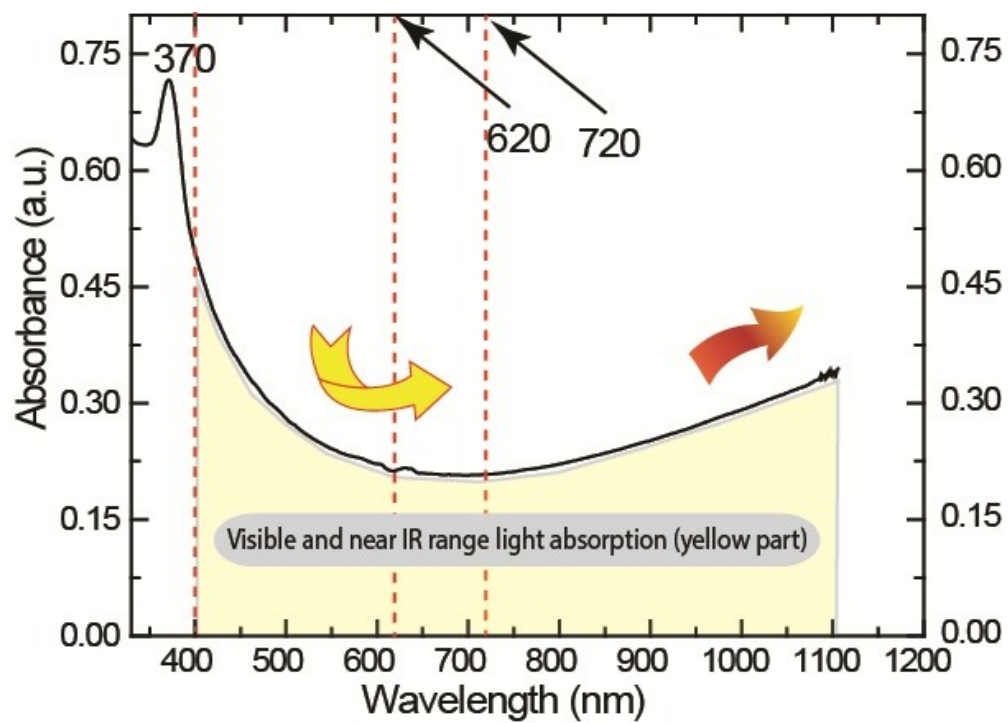

Figure S2. Raman spectra of ZnO nanorods. Yellow marked part shows the visible and near infra red (NIR)

Table S1. Comparison of dispersion concentration of ZnO nanoparticles

| Dispersion Concentration, mg/ml | Time for sonication or Stirring or treatment (in min) | Assisting materials                                | Solvent                                     |
|---------------------------------|-------------------------------------------------------|----------------------------------------------------|---------------------------------------------|
| 0.1-0.2 <sup>8</sup>            | 60                                                    | Sonication + Phosphate buffer solution + polymer   | Water                                       |
| 0.08 <sup>33</sup>              | 180                                                   | Stirring                                           | Ethanol                                     |
| 0.07 <sup>57, 58</sup>          | 120                                                   | Sonication only                                    | Dicromethane<br>Chloroform<br>Chlorobenzene |
| 0.02 <sup>3</sup>               | 60                                                    | Sonication+ Dispersant (ammonium polymethacrylate) | Water                                       |
| 0.02 <sup>29</sup>              | 180                                                   | Sonication + Zirconium phosphate + Epoxy polymer   | Polymer                                     |
| 0.01 <sup>32</sup>              | 30                                                    | Sonication + Buffering agent + organic matter      | Water + organic matter                      |
| 0.01 <sup>26</sup>              | -                                                     | Sonication + Organic matter                        | Water                                       |
| 0.05-0.10 <sup>30</sup>         | 30                                                    | Sonication + Buffer agent and sonication           | Water                                       |
| 0.001- 0.02 <sup>9</sup>        | 20                                                    | Sonication + CO <sub>2</sub> + Buffer,             | Water                                       |
| 0.01 <sup>27</sup>              | -                                                     | Sonication + Organic Materials                     | Water                                       |
| 0.001 <sup>20</sup>             | 60                                                    | Sonication, stirring, PH controlling, Surfactant   | Water                                       |
| <b>1.2 (Our work)</b>           | <b>5</b>                                              | <b>Sonication only</b>                             | <b>Ethanol</b>                              |
